# Supplementary material
Source: publisher site journal article supplement (https://www.dovepress.com/article/364997)
Supplement: Supplementary file 1 [file get_supplementary_file.php]

**Supplementary Material**

**Methods**

**Frailty Assessment (Data adapted from Curran et al1)**

Deficits were coded as 0=absent to 1=present. Each individual’s deficits were summed to generate a total deficit score. The Clinical Trial Frailty Index (CT-FI) was then calculated by dividing by the number of possible deficits as follows:

CT-FI= (accumulation of deficits)/(41-nmissQoL), where nmissQoL was the number of missing quality of life (QoL) components of the 29 items from the SF-36 and EQ-5D questionnaires. Each study participant was assigned to one of three subgroups based on the FI as follows: FI≤0.08 is classified as non-frail; FI>0.08 to ≤0.25 is classified as pre-frail; FI>0.25 is classified as frail. Participants with a missing FI were classified as unknown. If a participant had more than 10 missing QoL components, the FI was treated as missing, unless based on their available data their classification as frail was unquestionable (they already had sufficient deficits to be classified as frail).

The medical history was divided into 12 selected deficits (Tables S1 and S2). The coded combined medical history database from studies ZOE-50 and ZOE-70 were searched and participants with the relevant preferred terms were assigned to 1 or more of the deficits. If a subject had any of the listed events in a deficit category, they were assigned a max score of 1 for that deficit.15

**Table S1 Details of components of the Clinical Trial Frailty Index (CT-FI)**

| **Item**  **(Domain)** | **Scoring method based on response to questionnaire or medical history assessment** | **Max Contribution to CT-FI** |
| --- | --- | --- |
| *SF-36* Q1  (General Health) | Poor=1  Fair=0.5  Good=0  Very good=0  Excellent=0 | 1 |
| *SF-36* Q11A - Q11D  (General Health) | **Q11A, Q11C**  Definitely true=1  Mostly true=0.5  Don’t know=0  Mostly false=0  Definitely false=0  **Q11B, Q11D**  Definitely true=0  Mostly true=0  Don’t know=0  Mostly false=0.5  Definitely false=1 | 4 |
| *SF-36* Q3I - Q3J  (Physical Functioning) | Limited a lot=1  Limited a little=0.5  Not limited at all=0 | 10 |
| *SF-36* Q9A - Q9I  (Mental Health, Vitality) | **Q9A, Q9D, Q9E, Q9H**  All of the time=0  Most of the time=0  Some of the time=0  A little of the time=0.5  None of the time=1  **Q9B, Q9C, Q9F, Q9G, Q9I**  All of the time=1  Most of the time=0.5  Some of the time=0  A little of the time=0  None of the time=0 | 9 |
| *SF-36* Q2 Compared to one week before, how did the subject rate his / her health in general? | Much worse=1  Somewhat worse=0.5  Same=0  Somewhat better=0  Better=0 | 1 |
| *EQ-5D* Mobility | No problems=0  Some problems=0.5  Confined to bed=1 | 1 |
| *EQ-5D* Anxiety/Depression | No anxiety/depression=0  Moderate anxiety/depression=0.5  Extreme anxiety/depression=1 | 1 |
| *EQ-5D* Self care | No problems=0  Some problems=0.5  Inability to wash or dress himself /herself=1 | 1 |
| *EQ-5D* Usual activities | No problems=0  Some problems=0.5  Inability to perform usual activities=1 | 1 |
| Medical history | Cancer | 1 |
| Diabetes Mellitus | 1 |
| High Blood Pressure | 1 |
| Heart Attack | 1 |
| Congestive Heart Failure | 1 |
| Cerebrovascular Disease | 1 |
| Arthritis | 1 |
| Chronic Lung Disease | 1 |
| Stomach or Intestinal Ulcers | 1 |
| Migraine | 1 |
| Cataract | 1 |
| Glaucoma | 1 |
| **Total** |  | **41** |
|  |  |  |

**Notes:** Reproduced from Curran D, Kim JH, Matthews S, et al. Recombinant zoster vaccine is efficacious and safe in frail individuals. *J Am Geriatr Soc*. 2021;69(3):744–752. doi:10.1111/jgs.16917.1 © 2020 The Authors *Journal of the American Geriatrics Society* published by Wiley Periodicals LLC on behalf of The American Geriatrics Society. Creative Commons Attribution-NonCommercial License (https://creativecommons.org/licenses/by-nc/3.0/legalcode).

**Abbreviations:** SF-36, Short Form Survey-36; EQ-5D, EuroQol-5 Dimension.

Table S2 Detail of medical history search items

| **Deficit** | **MedDRA version 18 Search Terms** |
| --- | --- |
| Cancer | Malignancy related conditions (SMQ)  Malignant tumours (SMQ) |
| Diabetes Mellitus | Diabetes mellitus (incl subtypes) (HLT)  Diabetic complications (HLGT) |
| High Blood Pressure | Hypertension (SMQ) |
| Heart Attack | Ischaemic heart disease (SMQ) |
| Congestive Heart Failure | Cardiac failure (SMQ) |
| Cerebrovascular Disease | Central nervous system vascular disorders (SMQ) |
| Arthritis | Arthritis (SMQ) |
| Chronic Lung Disease | Asthma/bronchospasm (SMQ)  Interstitial lung disease (SMQ)  Pulmonary hypertension (SMQ)  Chronic obstructive pulmonary disease (PT) / Infective exacerbation of chronic obstructive airways disease (PT)  Bronchiectasis (PT) / Infective exacerbation of bronchiectasis (PT)  Cystic fibrosis (PT) / Cystic fibrosis lung (PT) / Infective pulmonary exacerbation of cystic fibrosis (PT)  Chronic respiratory disease (PT)  Chronic respiratory failure (PT) |
| Stomach or Intestinal Ulcers | Gastrointestinal ulceration (SMQ) |
| Migraine | Migraine headaches (HLT)  Migraine prophylaxis (PT) |
| Cataract | Cataract conditions (HLT)  Cataract operation (PT)  Cataract diabetic (PT)  Cataract operation complication (PT) |
| Glaucoma | Glaucoma (SMQ) |

**Notes:** Reproduced from Curran D, Kim JH, Matthews S, et al. Recombinant zoster vaccine is efficacious and safe in frail individuals. *J Am Geriatr Soc*. 2021;69(3):744–752. doi:10.1111/jgs.16917.1 © 2020 The Authors *Journal of the American Geriatrics Society* published by Wiley Periodicals LLC on behalf of The American Geriatrics Society. Creative Commons Attribution-NonCommercial License (https://creativecommons.org/licenses/by-nc/3.0/legalcode).

**Abbreviations:** SMQ, Standardized MedDRA queries; HLGT, High Level Group Term; HLT, High Level Term; PT, Preferred Term.

**Table S3 Piecewise linear model of Clinical Trial Frailty Index by age and gender**

| **Model** | **Parameter** | **Estimate** | **SE** | **t-Value** | **P-Value** |
| --- | --- | --- | --- | --- | --- |
| A | Intercept | -0.0135 | 0.0178 | -0.76 | 0.45 |
|  | Age < 70 years | 0.0016 | 0.0003 | 5.40 | <.0001 |
|  | Gender (Female v Male) | -0.0441 | 0.0226 | -1.95 | 0.059 |
|  | Age by Gender interaction (Female v Male) | 0.0009 | 0.0004 | 2.27 | 0.029 |
| B | Intercept | -0.2231 | 0.0184 | -12.11 | <.0001 |
|  | Age ≥ 70 years | 0.0047 | 0.0002 | 19.20 | <.0001 |
|  | Gender (Female v Male) | -0.0629 | 0.0249 | -2.53 | 0.016 |
|  | Age by Gender interaction (Female v Male) | 0.0011 | 0.0003 | 3.44 | 0.0014 |

A, Subjects < 70 years; B, Subjects ≥70 years; SE, standard error.

Table S4 Mean of Clinical Trial Frailty Index by presence of medical history comorbidity

| **Medical History** | **Present** | **N** | **%** | **Mean** | **SD** |
| --- | --- | --- | --- | --- | --- |
| Arthritis | No | 18149 | 67.61 | 0.0957 | 0.0873 |
| Yes | 8696 | 32.39 | 0.1713 | 0.1031 |
| Migraine | No | 26135 | 97.36 | 0.1197 | 0.0991 |
| Yes | 710 | 2.64 | 0.1386 | 0.1003 |
| Hypertension | No | 12522 | 46.65 | 0.0831 | 0.0840 |
| Yes | 14323 | 53.35 | 0.1526 | 0.1001 |
| Lung | No | 24411 | 90.93 | 0.1133 | 0.0947 |
| Yes | 2434 | 9.07 | 0.1893 | 0.1160 |
| Glaucoma | No | 25660 | 95.59 | 0.1180 | 0.0986 |
| Yes | 1185 | 4.41 | 0.1675 | 0.1013 |
| Cataract | No | 23758 | 88.50 | 0.1125 | 0.0961 |
| Yes | 3087 | 11.50 | 0.1793 | 0.1029 |
| Cancer | No | 24706 | 92.03 | 0.1169 | 0.0984 |
| Yes | 2139 | 7.97 | 0.1587 | 0.1010 |
| CHF | No | 25874 | 96.38 | 0.1161 | 0.0965 |
| Yes | 971 | 3.62 | 0.2289 | 0.1082 |
| Heart | No | 23542 | 87.70 | 0.1105 | 0.0944 |
| Yes | 3303 | 12.30 | 0.1891 | 0.1055 |
| Diabetes | No | 22275 | 82.98 | 0.1077 | 0.0927 |
| Yes | 4570 | 17.02 | 0.1813 | 0.1069 |
| Stomach | No | 25537 | 95.13 | 0.1175 | 0.0980 |
| Yes | 1308 | 4.87 | 0.1725 | 0.1086 |
| Cerebrovascular | No | 25302 | 94.25 | 0.1153 | 0.0962 |
| Yes | 1543 | 5.75 | 0.1995 | 0.1127 |

N, Number of subjects in the given category; SD, Standard Deviation; CHF, congestive heart failure.

The frailty index in this table is constructed from all 41 deficits.

Percentages are based on the total number of subjects with a non-missing frailty index.

Table S5 Jackknife by variables Analysis of Cox Proportional Hazards Univariate model

| **Deficit removed from Estimate**  **of HR** | **HR** | **95% CI** |
| --- | --- | --- |
| SF-36 Q1 | 1.058 | ( 1.053, 1.062) |
| SF-36 Q2 | 1.056 | ( 1.052, 1.061) |
| SF-36 Q3A | 1.058 | ( 1.054, 1.062) |
| SF-36 Q3B | 1.059 | ( 1.054, 1.063) |
| SF-36 Q3C | 1.059 | ( 1.055, 1.063) |
| SF-36 Q3D | 1.059 | ( 1.054, 1.063) |
| SF-36 Q3E | 1.058 | ( 1.054, 1.063) |
| SF-36 Q3F | 1.059 | ( 1.055, 1.063) |
| SF-36 Q3G | 1.059 | ( 1.054, 1.063) |
| SF-36 Q3H | 1.059 | ( 1.054, 1.063) |
| SF-36 Q3I | 1.058 | ( 1.054, 1.063) |
| SF-36 Q3J | 1.058 | ( 1.053, 1.062) |
| SF-36 Q9A | 1.058 | ( 1.053, 1.062) |
| SF-36 Q9B | 1.057 | ( 1.053, 1.061) |
| SF-36 Q9C | 1.058 | ( 1.054, 1.062) |
| SF-36 Q9D | 1.057 | ( 1.053, 1.061) |
| SF-36 Q9E | 1.057 | ( 1.052, 1.061) |
| SF-36 Q9F | 1.057 | ( 1.052, 1.061) |
| SF-36 Q9G | 1.057 | ( 1.053, 1.061) |
| SF-36 Q9H | 1.058 | ( 1.053, 1.062) |
| SF-36 Q9I | 1.058 | ( 1.054, 1.062) |
| SF-36 Q11A | 1.057 | ( 1.053, 1.061) |
| SF-36 Q11B | 1.057 | ( 1.053, 1.061) |
| SF-36 Q11C | 1.057 | ( 1.053, 1.061) |
| SF-36 Q11D | 1.058 | ( 1.054, 1.062) |
| EQ5D Mobility | 1.057 | ( 1.053, 1.061) |
| EQ5D Usual Activities | 1.058 | ( 1.053, 1.062) |
| EQ5D Anxiety/Depression | 1.057 | ( 1.052, 1.061) |
| EQ5D Self Care | 1.058 | ( 1.053, 1.062) |
| Arthritis | 1.057 | ( 1.053, 1.062) |
| Migraine | 1.056 | ( 1.052, 1.060) |
| Hypertension | 1.056 | ( 1.052, 1.060) |
| Lung | 1.056 | ( 1.052, 1.060) |
| Glaucoma | 1.056 | ( 1.052, 1.060) |
| Cataract | 1.056 | ( 1.052, 1.060) |
| Cancer | 1.055 | ( 1.051, 1.060) |
| CHF | 1.055 | ( 1.051, 1.060) |
| Heart | 1.056 | ( 1.052, 1.060) |
| Diabetes | 1.056 | ( 1.052, 1.060) |
| Stomach | 1.056 | ( 1.052, 1.060) |
| Cerebrovascular | 1.056 | ( 1.052, 1.060) |

Cox regression analyses of the frailty index. The frailty index was included in a univariate model.

The frailty index hazard ratios (HR) are calculated with % levels of the index (i.e. the HR measures a change of 0.01 on the index). The HR are obtained from the Cox model using the frailty index that is recalculated excluding the deficit in that row. The confidence interval (CI) of the HR is based on the Wald upper and lower estimates

SF-36, Short Form Survey-36; EQ-5D, EuroQol-5 Dimension; CHF, Congestive Heart Failure.

**Figure S1 Survival Function by Frailty Status and gender.**


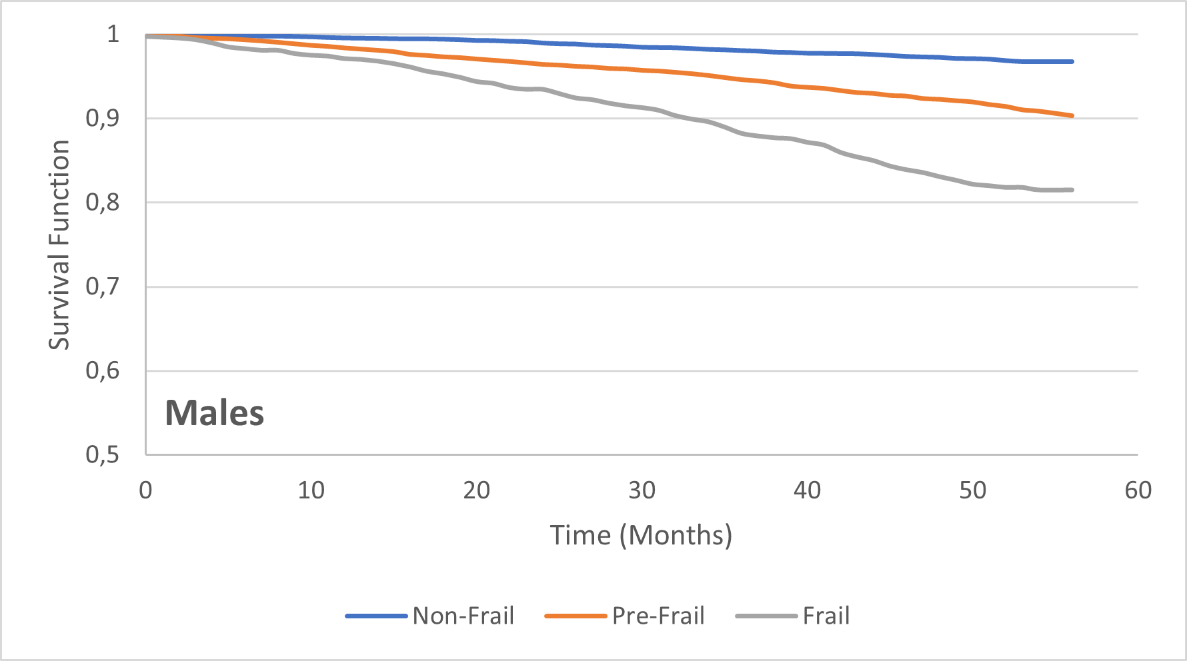


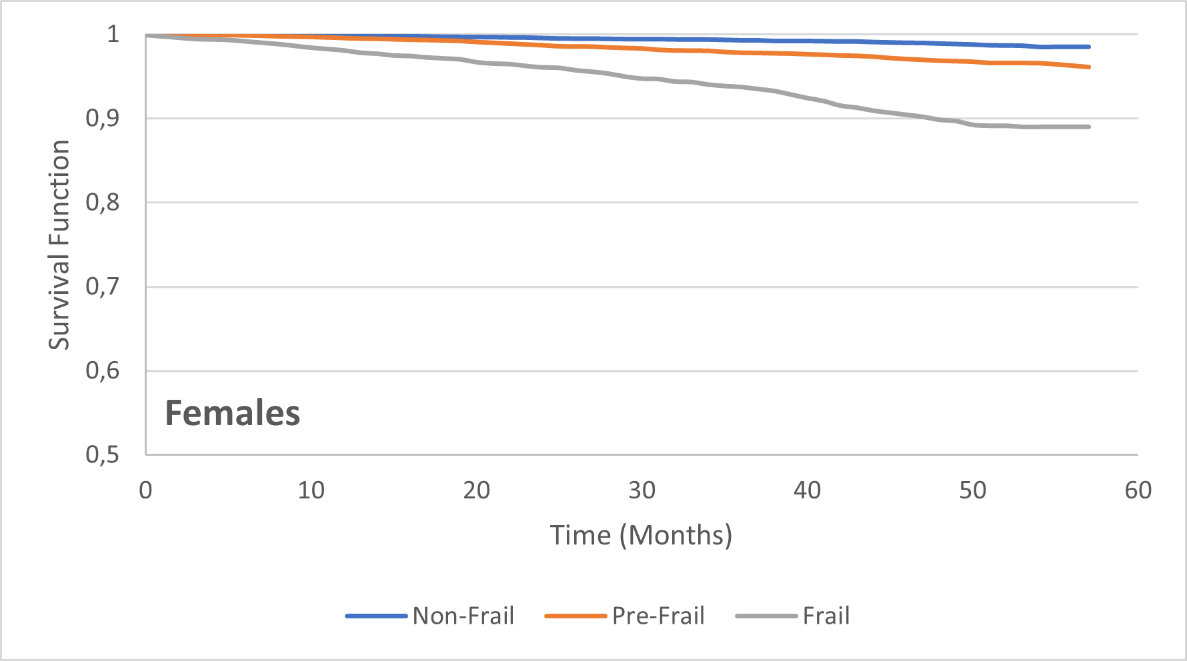


**Reference**

1. Curran D, Kim JH, Matthews S, et al. Recombinant zoster vaccine is efficacious and safe in frail individuals. *J Am Geriatr Soc*. 2021;69(3):744–752. doi:10.1111/jgs.16917
